# Supplementary material for: Using TLC-MALDI-TOF to Interrogate In Vitro Peptidyl Proximal Preferences of PARP14 and Glycohydrolase Specificity
Source: MDPI journal article supplement (doi:10.3390/molecules28166061), 2023-08-15
Supplement: s1 [file s1]

## Supporting Information

| Peptide | Peptide Sequence   | Unmodified $m/z$ | +MAR $m/z$ | pI    |
|---------|--------------------|------------------|------------|-------|
| P14p1   | SLNYKSTSSGHREISSPR | 2006.16          | 2546.16    | 10.49 |
| P14p2   | WHREISSPR          | 1166.59          | 1706.59    | 10.95 |
| P14p3   | SLNYKSTSSGHR       | 1336.43          | 1876.43    | 10.50 |
| P14p4   | RWSSGHREISS        | 1301.38          | 1841.38    | 10.95 |
| P14p5   | SLNYKSTSSGHREIS    | 1664.81          | 2204.81    | 9.67  |
| P14p6   | HREISW             | 826.91           | 1366.91    | 7.90  |
| P14p7   | HRDISW             | 812.88           | 1352.88    | 6.74  |
| P14p8   | AREISWH            | 897.99           | 1437.99    | 7.90  |
| P14p9   | HAEISWR            | 897.99           | 1437.99    | 7.90  |
| P14p10  | HRAISWR            | 925.06           | 1465.06    | 12.00 |
| P14p11  | HREASW             | 784.83           | 1324.83    | 7.90  |
| P14p12  | HREIAW             | 810.91           | 1350.91    | 7.90  |
| P14p13  | HMEISWR            | 958.11           | 1498.11    | 7.90  |
| P14p14  | HKEISW             | 798.90           | 1338.90    | 7.88  |
| P14p15  | HIRESW             | 826.91           | 1366.91    | 7.90  |
| P14p16  | HISREW             | 826.91           | 1366.91    | 7.90  |

**Table S1.** Peptides analyzed in the current study. Peptide sequence, unmodified  $m/z$ , expected +MAR  $m/z$ , and isoelectric point (pI) are indicated.

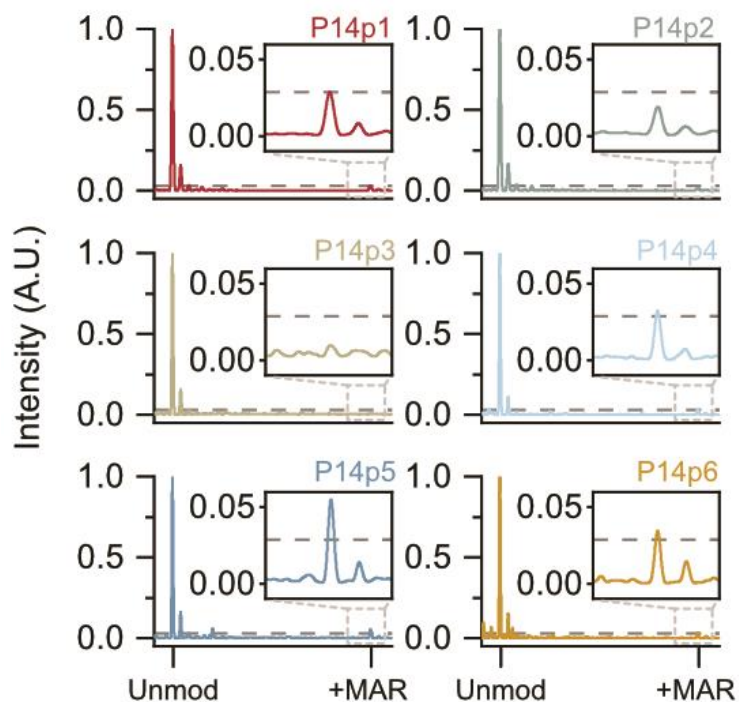

**Figure S1.** ADP-ribosylation of P14c selective peptides by P14-Δ553. P14-Δ553 and the indicated peptides were incubated in the presence of NAD<sup>+</sup> and subjected to TLC-MALDI to visualize the resulting increase in  $m/z$  due to MAR (+541 Da). The dashed line represents the intensity observed for ADP-ribosylation of P14p1 by P14-Δ553 and the inset highlights the +MAR spectra.

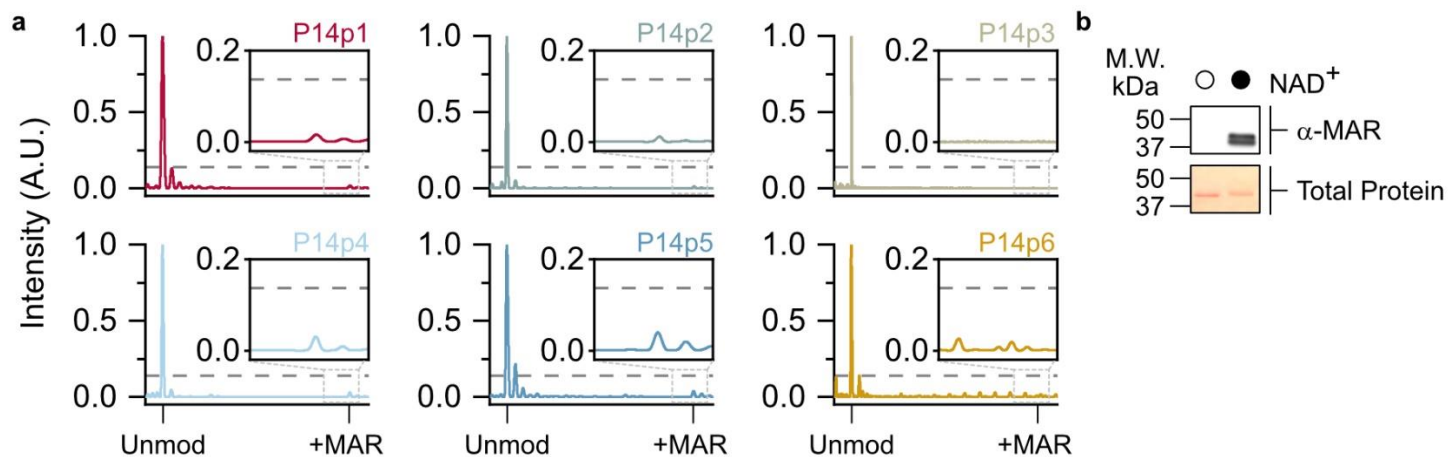

**Figure S2.** Minimal ADP-ribosylation of P14 selective peptides by P15. (a) P15 and the indicated peptides were incubated in the presence of NAD<sup>+</sup> and subjected to TLC-MALDI to visualize the resulting increase in  $m/z$  due to MAR (+541 Da). The dashed line represents the intensity observed for ADP-ribosylation of P14p6 by P14c and the inset highlights the +MAR spectra. (b) *In vitro* P15 ADP-ribosylation assay.

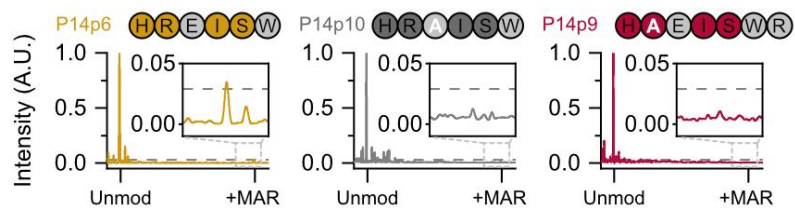

**Figure S3.** ADP-ribosylation of key alanine mutants by P14-Δ553. P14-Δ553 and the indicated peptides were incubated in the presence of NAD<sup>+</sup> and subjected to TLC-MALDI to visualize the resulting increase in *m/z* due to MAR (+541 Da). The dashed line represents the intensity observed for ADP-ribosylation of P14p6 by P14-Δ553 and the inset highlights the +MAR spectra.

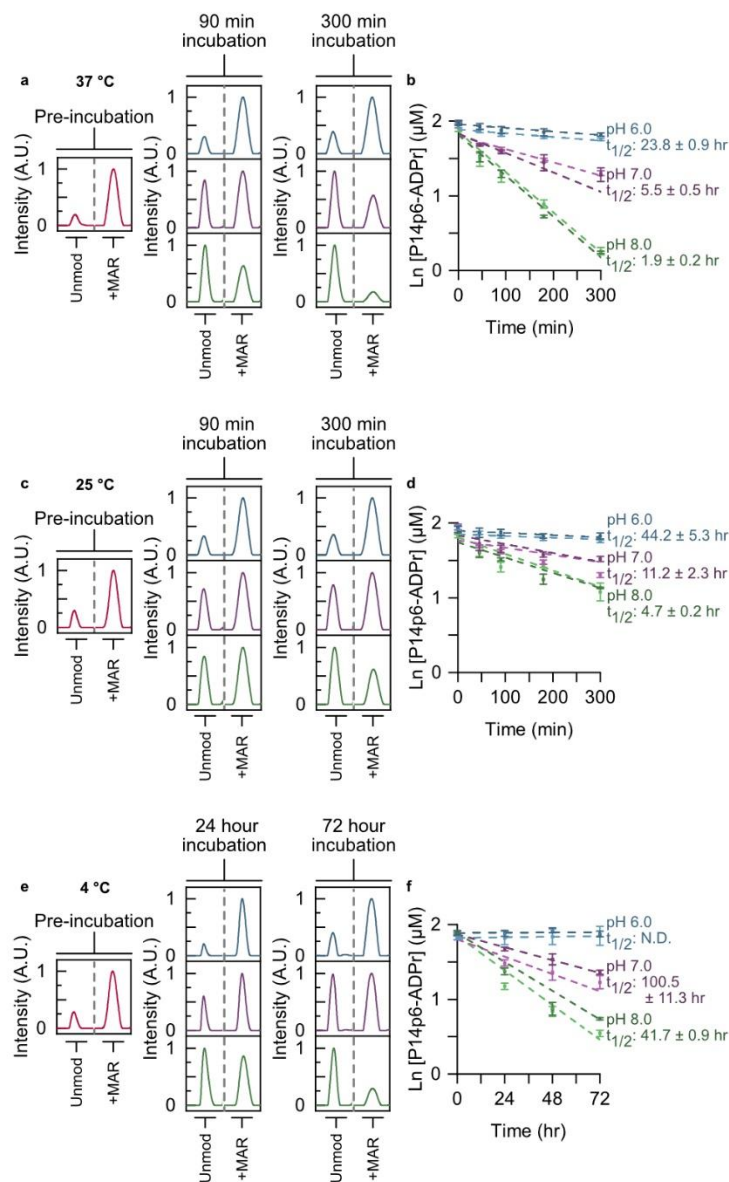

**Figure S4.** Non-enzymatic hydrolysis of MAR is sequence independent. (a) Synthesized MAR—P14p9 peptide was equilibrated at 37 °C and pH 6.0 (blue), pH 7.0 (purple), or pH 8.0 (green) and MAR hydrolysis was monitored at the indicated times using TLC-MALDI. The unmodified and modified peaks are shown for comparison. (b) MS spectra were integrated to determine the relative levels of MAR hydrolysis and fit to a pseudo first-order rate expression to determine the half-life of the MAR modification (mean  $\pm$  S.E.M.,  $n = 3$ ). The fits obtained for P14p6 are shown for comparison (lighter coloring). (c) Experiments were performed as in (a) at 25 °C. (d) Determination of MAR half-lives at 25 °C. (e) Experiments were performed as in (a) at 4 °C. (f) Determination of MAR half-lives at 4 °C.

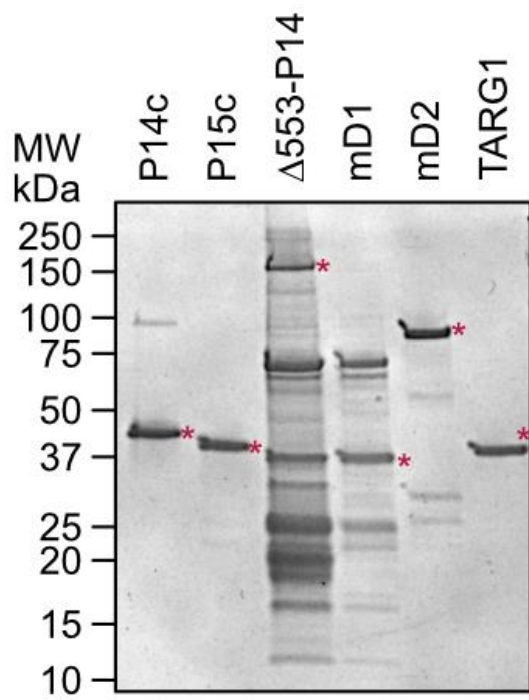

**Figure S5.** Purified proteins utilized in this study. All proteins were loaded at a concentration of 500  $\mu$ M and visualized using Coomassie stain following separation on an SDS-PAGE gel. The expected recombinant protein for each sample is indicated by an \*.
